# Supplementary material for: Seeded silicon nanowire growth catalyzed by commercially available bulk metals: broad selection of metal catalysts, superior field emission performance, and versatile nanowire/metal architectures
Source: Royal Society of Chemistry journal article supplement (doi:10.1039/c1jm11956g), 2011-01-01
Supplement: c1jm11956g.pdf [file c1jm11956g.pdf]

**Seeded silicon nanowire growth catalyzed by commercially available bulk metals: broad selection of metal catalysts, superior field emission performance, and versatile nanowire/metal architectures**

Fang-Wei Yuan, Hong-Jie Yang, and Hsing-Yu Tuan\*

Department of Chemical Engineering, National Tsing Hua University, 101, Section 2, Kuang-Fu Road, Taiwan 30013

**Supporting Information.**

**Supplementary Tables**

**Table S1.** Quantitative XPS analysis result of metal substrates

| Atomic (%)          | Cu     | Al     | Ti     | Pb     | Ag     | Fe     | Ni     | Au   | Zn   |
|---------------------|--------|--------|--------|--------|--------|--------|--------|------|------|
| copper substrate    | > 99.9 | <0.1   | <0.1   | <0.1   | <0.1   | <0.1   | <0.1   | <0.1 | <0.1 |
| aluminium substrate | <0.1   | > 99.9 | <0.1   | <0.1   | <0.1   | <0.1   | <0.1   | <0.1 | <0.1 |
| titanium substrate  | <0.1   | <0.1   | > 99.9 | <0.1   | <0.1   | <0.1   | <0.1   | <0.1 | <0.1 |
| lead substrate      | <0.1   | <0.1   | <0.1   | > 99.9 | <0.1   | <0.1   | <0.1   | <0.1 | <0.1 |
| silver substrate    | <0.1   | <0.1   | <0.1   | <0.1   | > 99.9 | <0.1   | <0.1   | <0.1 | <0.1 |
| iron substrate      | <0.1   | <0.1   | <0.1   | <0.1   | <0.1   | > 99.9 | <0.1   | <0.1 | <0.1 |
| nickel substrate    | <0.1   | <0.1   | <0.1   | <0.1   | <0.1   | <0.1   | > 99.9 | <0.1 | <0.1 |

## Supplementary Figures

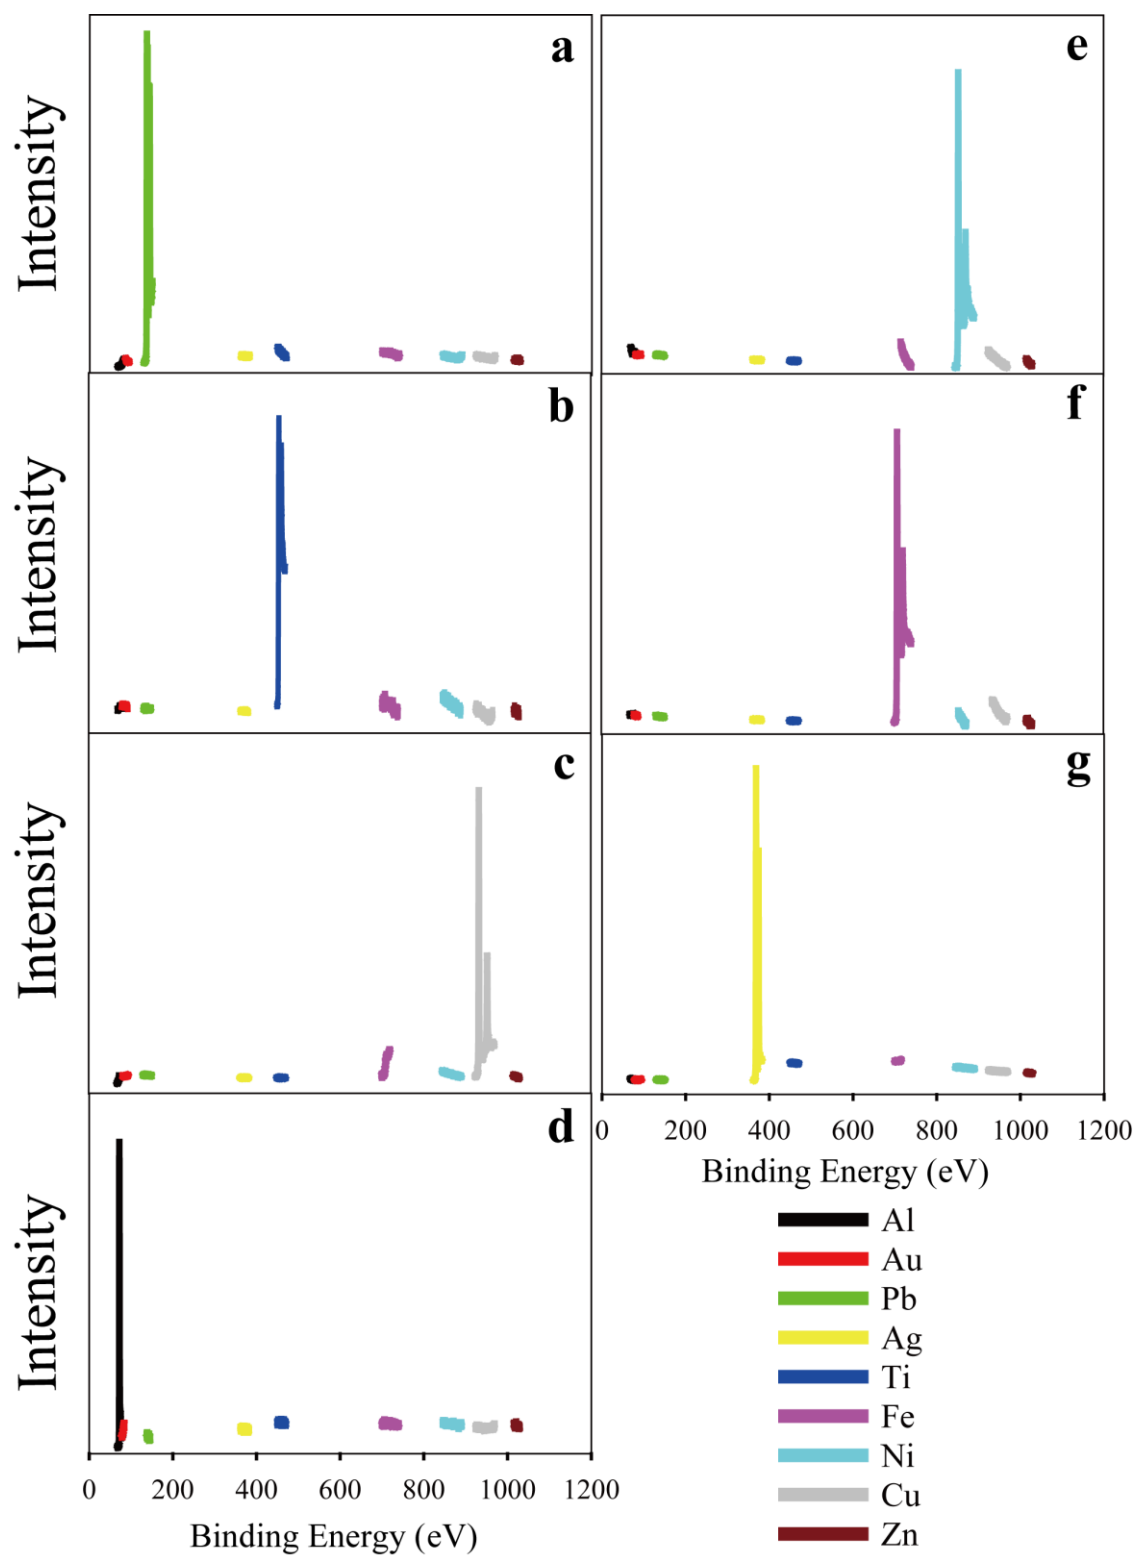

**Figure S1.** XPS spectrum of a (a) Pb, (b) Ti, (c) Cu, (d) Al, (e) Ni, (f) Fe, and (g) Ag substrate, respectively.

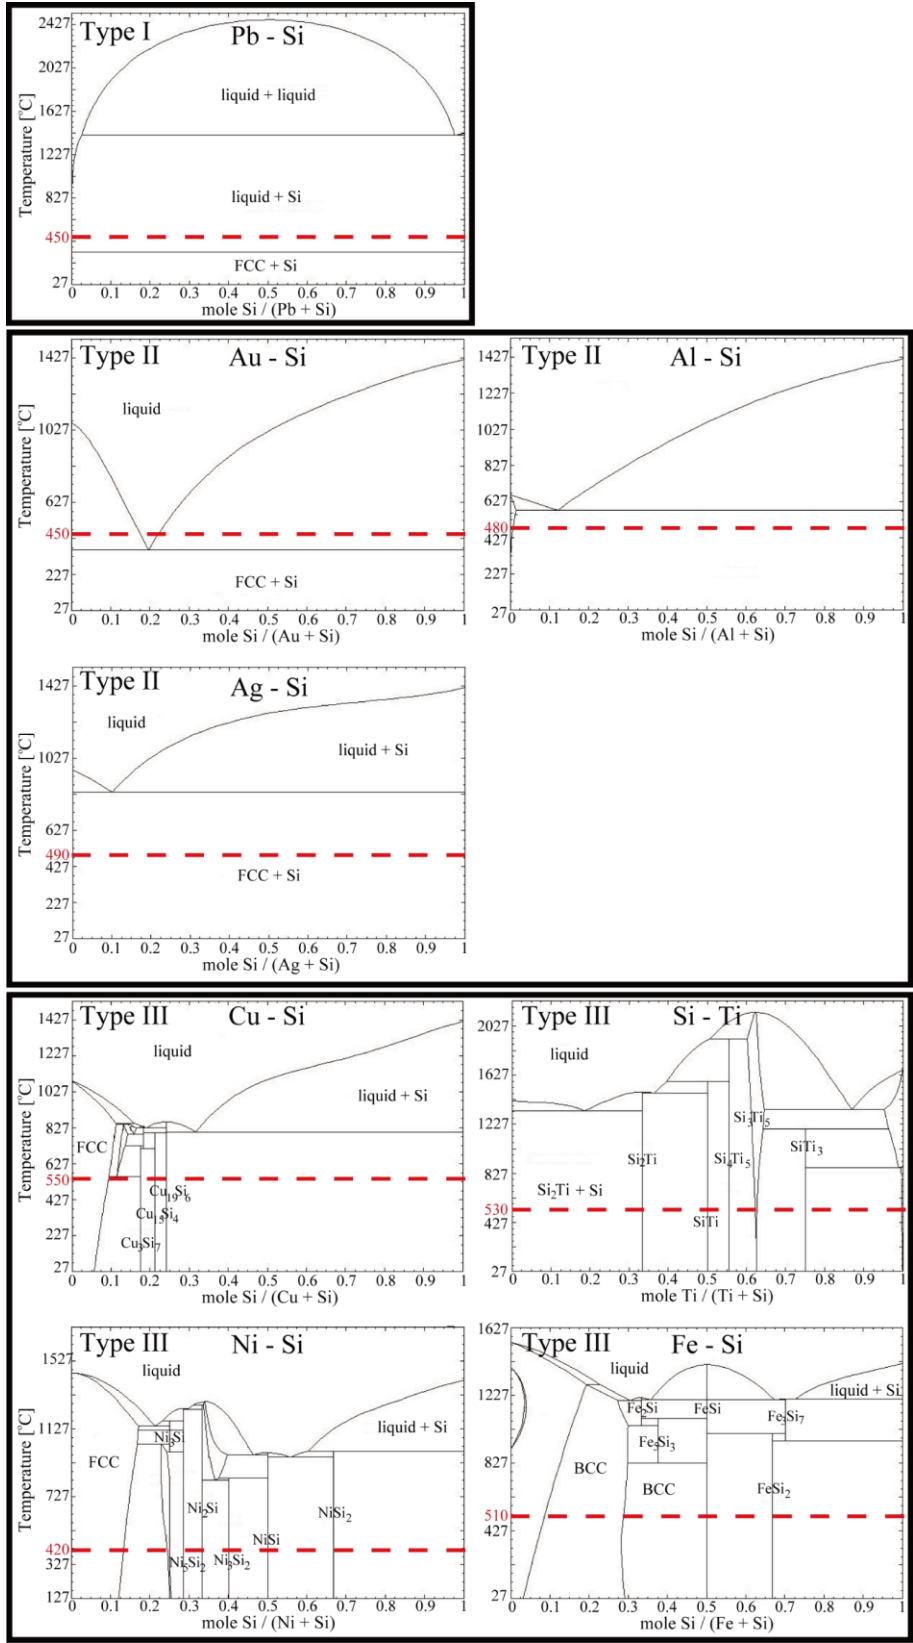

**Figure S2.** Metal/Si phase diagrams of metals explored in this study.<sup>1</sup> The type notion refers to the classification as shown in Figure 1. The reactions temperatures for Si nanowire synthesis are marked in red dotted line.



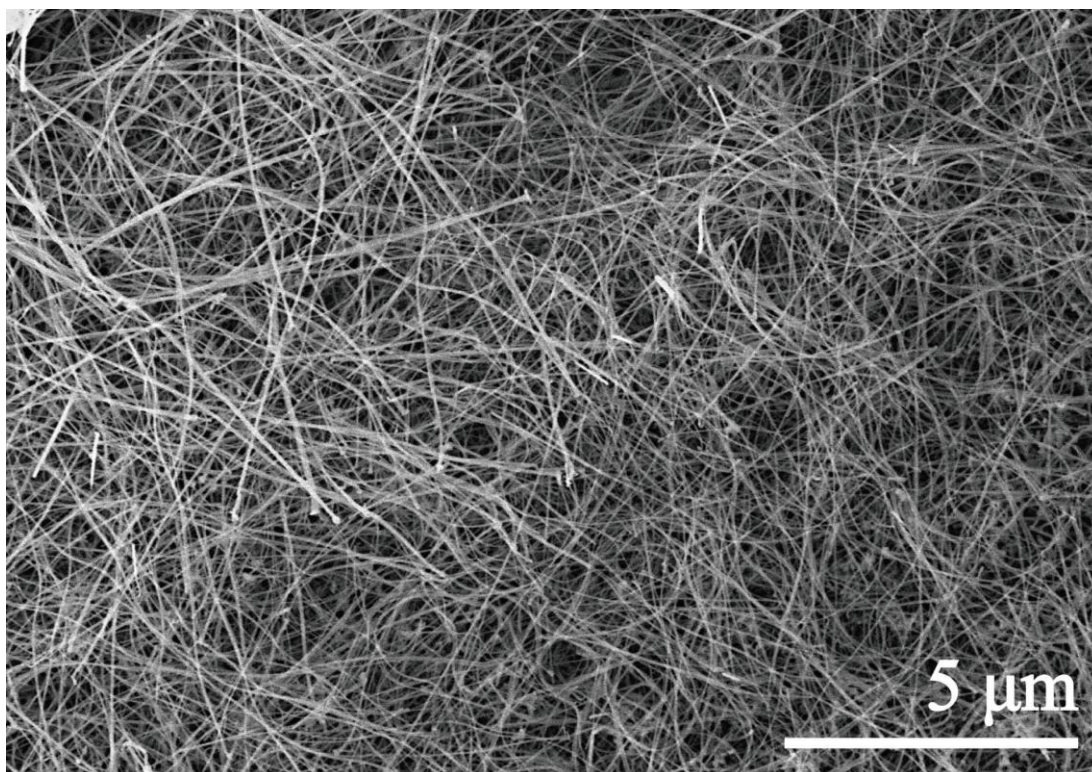

**Figure S3.** HRSEM image of Si nanowires grown on a Al substrate.

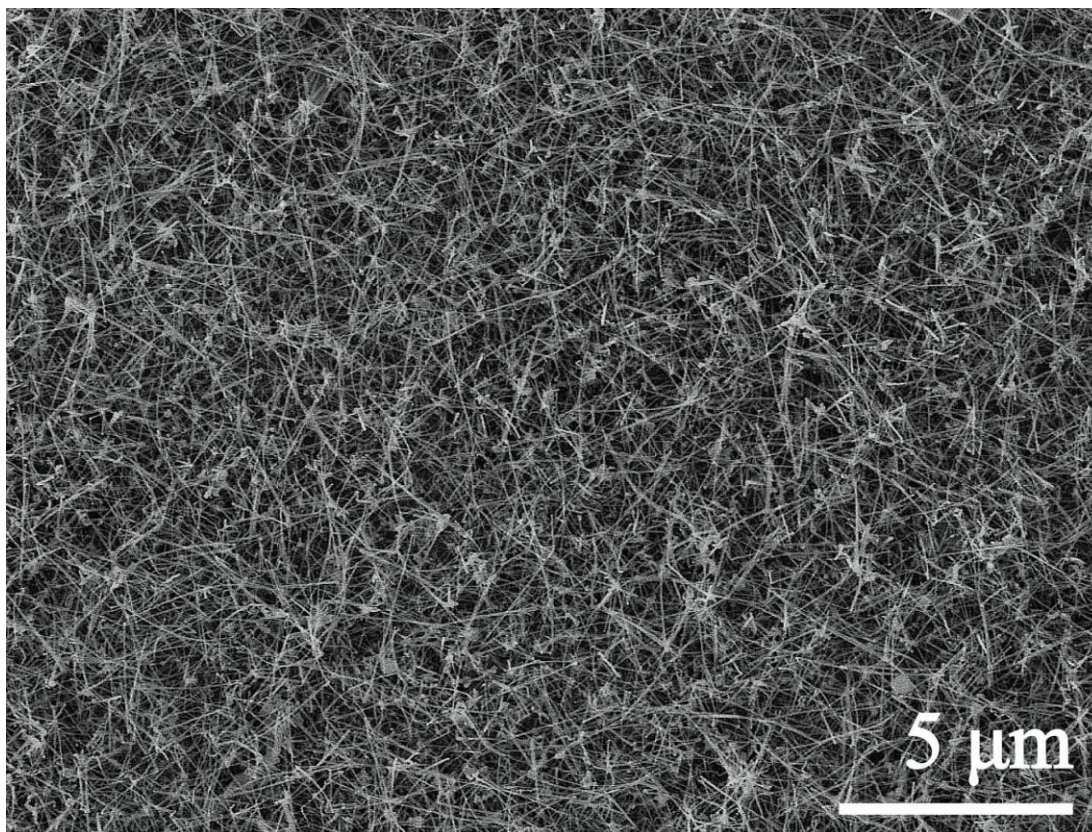

**Figure S4.** HRSEM image of Si nanowires grown on a Cu substrate.



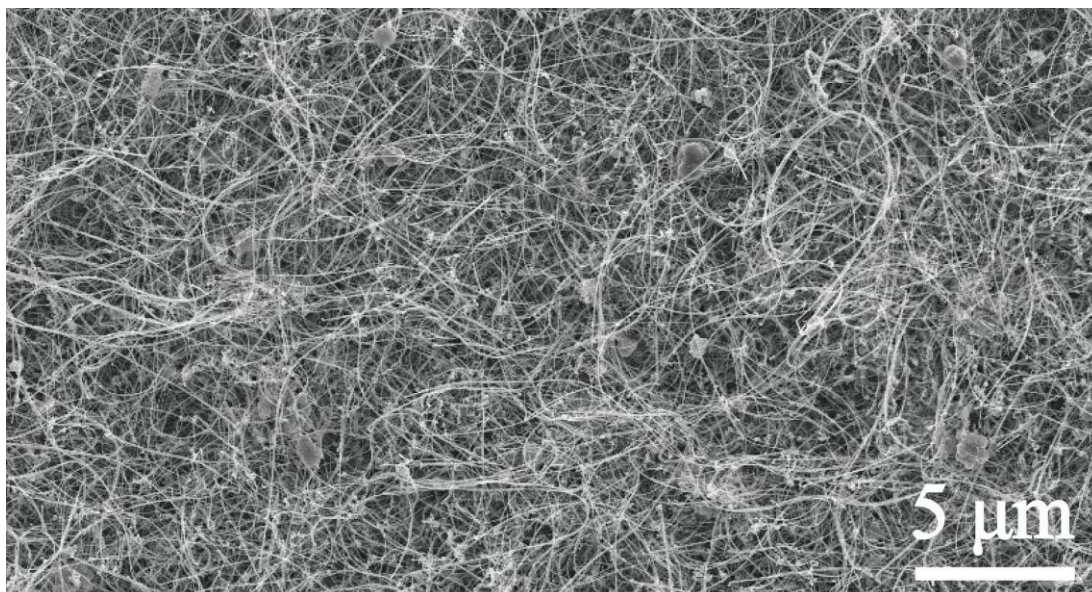

**Figure S5.** HRSEM images of Si nanowires grown on a Ti substrate.

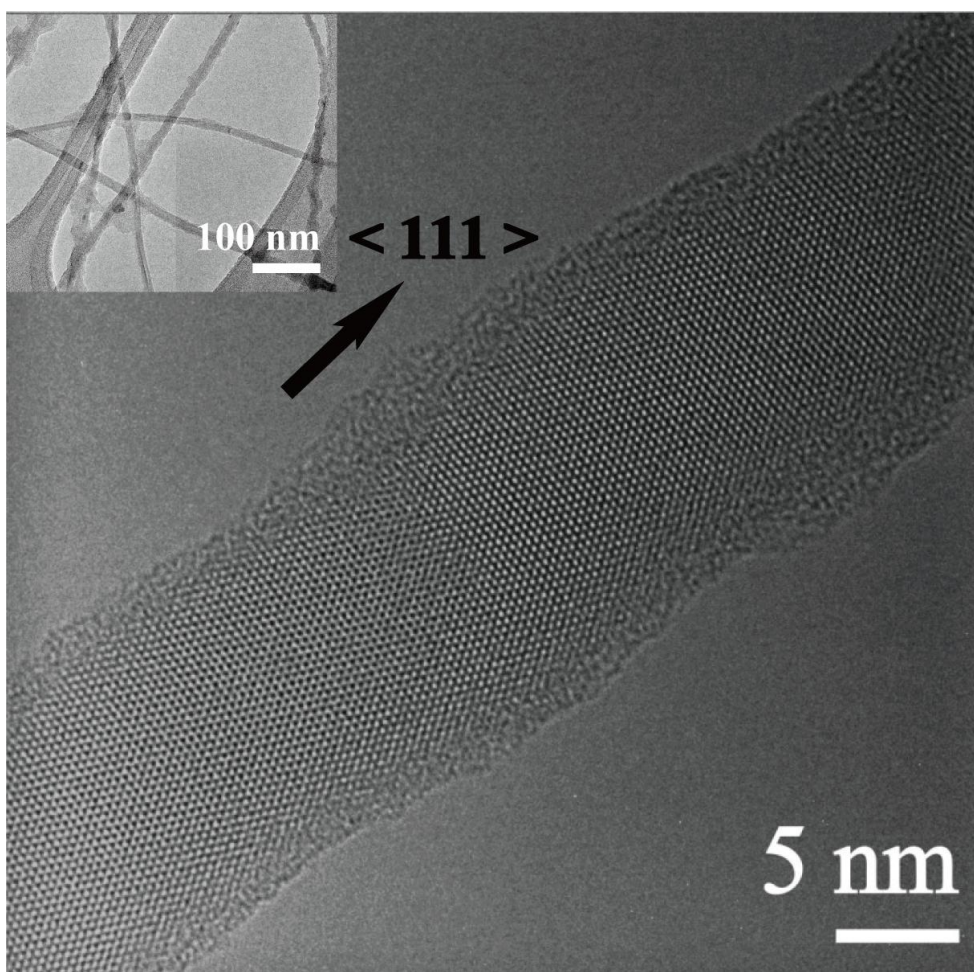

**Figure S6.** TEM images of Si nanowires grown from a Pb substrate in supercritical benzene. Inset: low resolution TEM image of Si nanowires.

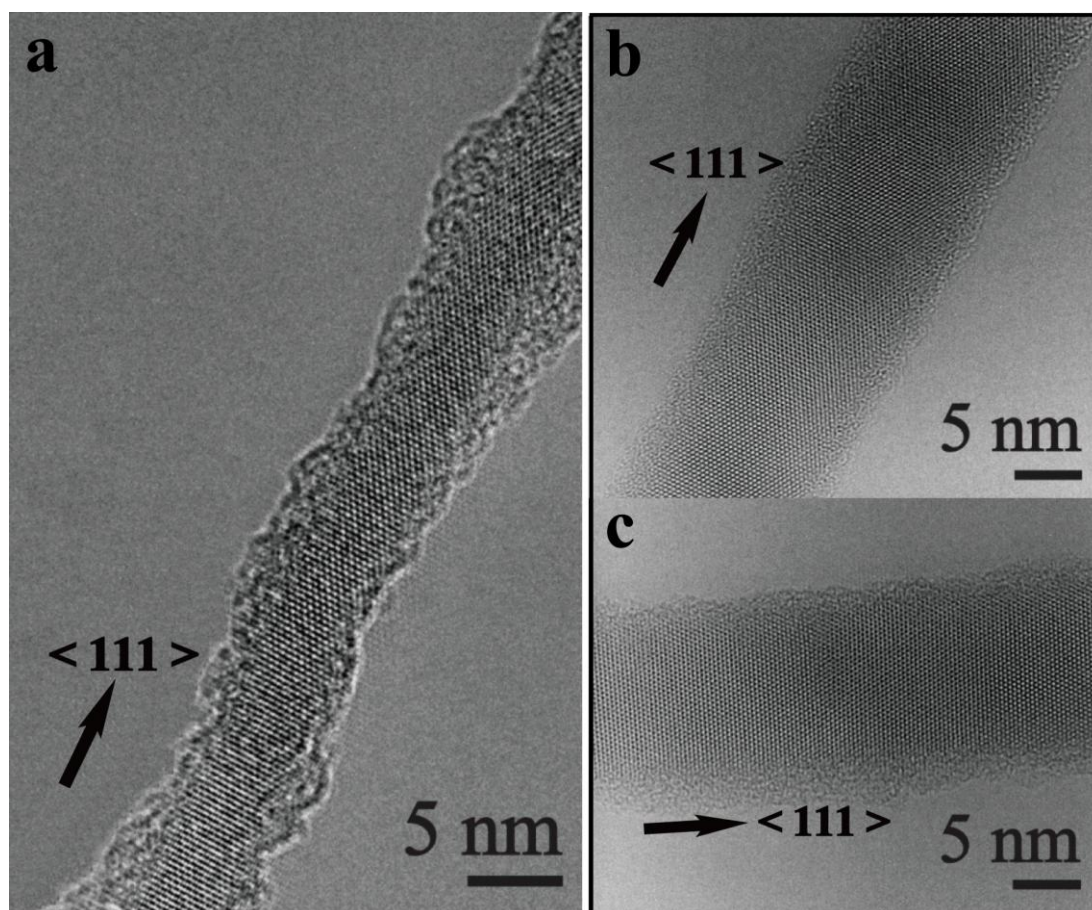

**Figure S7.** HRTEM images of single-crystalline Si nanowires grown from a (a) Al and (b, c) Ag substrate, respectively.



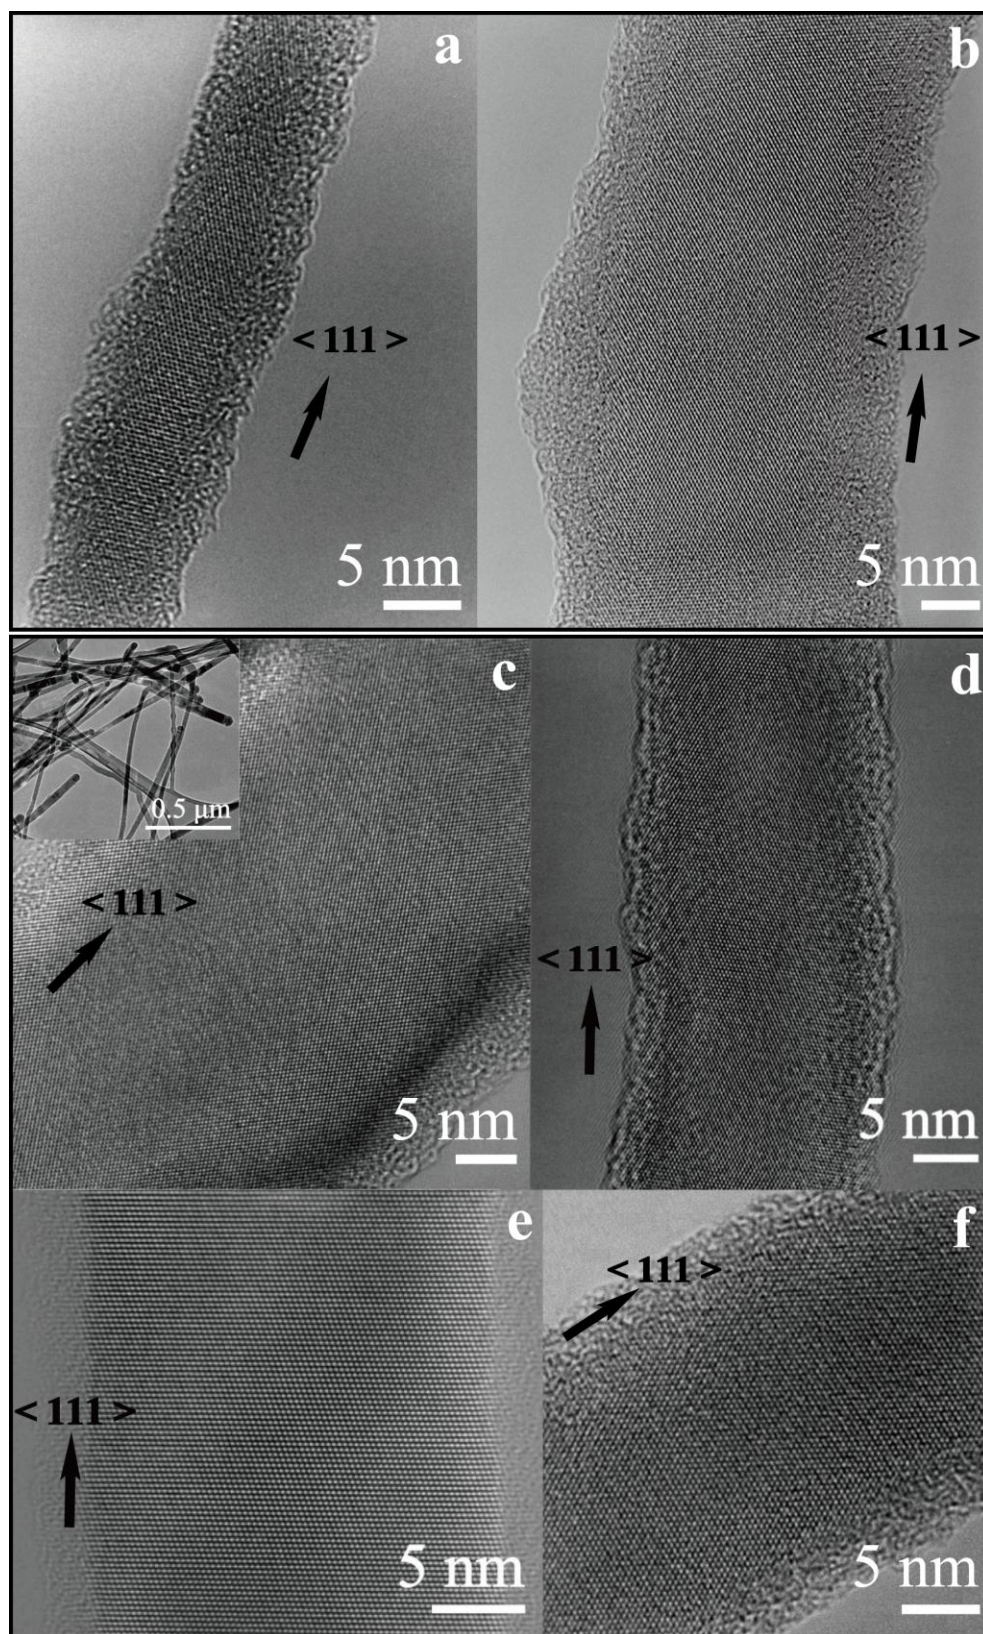

**Figure S8.** HRTEM images of single-crystalline Si nanowires grown from a (a, b) Ti and (c-f) Cu substrate, respectively. Inset: low resolution TEM image of Si nanowires.

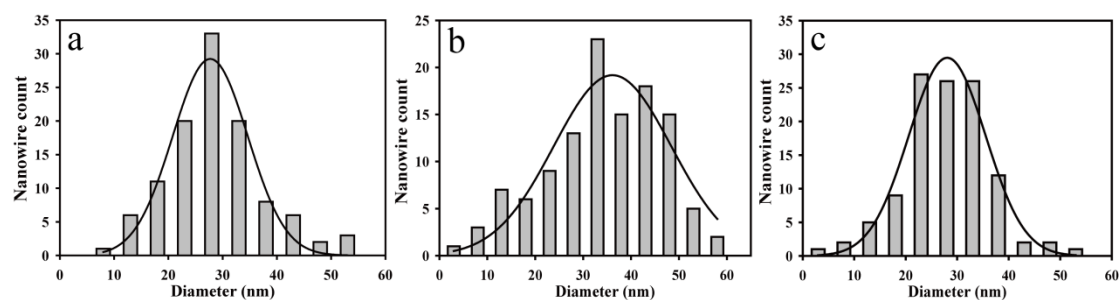

**Figure S9.** Size histograms of Si nanowires grown from (a) Cu, (b) Al, and (c) Ti metal substrates, respectively. The solid lines show a Gaussian fit of the nanowire distributions. The average diameter (standard deviation):  $28.6 \pm 8.8$  nm,  $34.2 \pm 11.9$  nm, and  $27.8 \pm 8.3$  nm for Cu-, Al-, and Ti- seeded reactions, respectively.

Reference:

1. Thaddeus, B. M.; Hiroaki, O. S. P. R.; Linda, K. Binary Alloy Phase Diagram, 2nd ed.; ASM Internation: Materials Park, OH, 1990; Vol. 1.
